# Supplementary material for: Enhanced inverted organic solar cell performance by post-treatments of solution-processed ZnO buffer layers
Source: Royal Society of Chemistry journal article supplement (doi:10.1039/c3ra46702c), 2014-01-01
Supplement: c3ra46702c.pdf [file c3ra46702c.pdf]

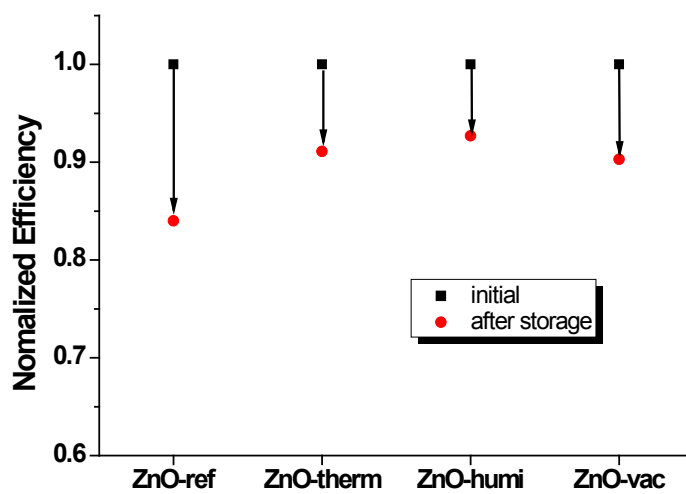

Fig. S1 The stability of the un-encapsulated devices stored in nitrogen-filled glove box for about half a year.
